# Supplementary material
Source: MDPI journal article supplement (https://www.mdpi.com/2624-781X/3/4/34)

**Supporting Information**

**Microwave-Assisted Synthesis of Tri-substituted 1,3,5- Triazines from  
Metformin using Benzotriazole Chemistry**

Siva S. Panda\*, Eyana Thomas and Ashley M. Pham

*Department of Chemistry and Physics, Augusta University, Augusta, GA 30912, USA*

\*Correspondence: author, E-mail: [sipanda@augusta.edu](mailto:sipanda@augusta.edu), [sspanda12@gmail.com](mailto:sspanda12@gmail.com)

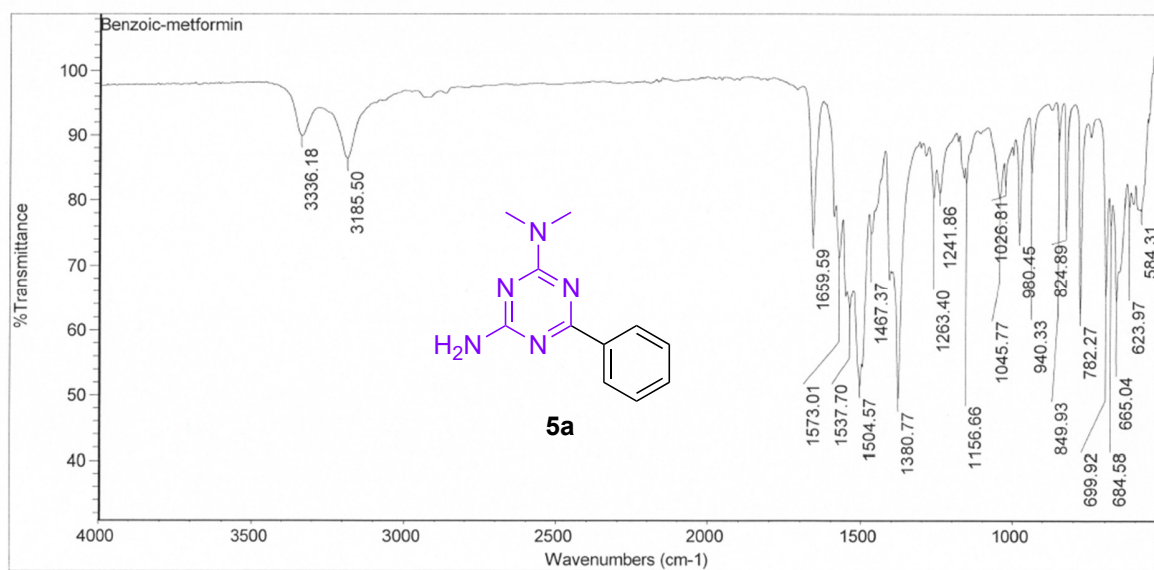

| Compound Label       | <i>m/z</i> | RT    | Algorithm       | Calcd. Mass |
|----------------------|------------|-------|-----------------|-------------|
| Cpd 1: 0.171 79.0213 | 215.1179   | 0.171 | Find By Formula | 215.1171    |

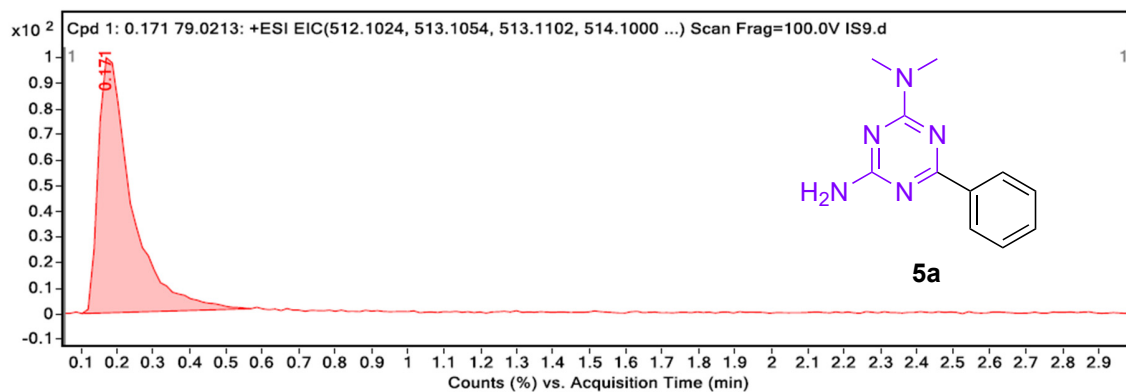

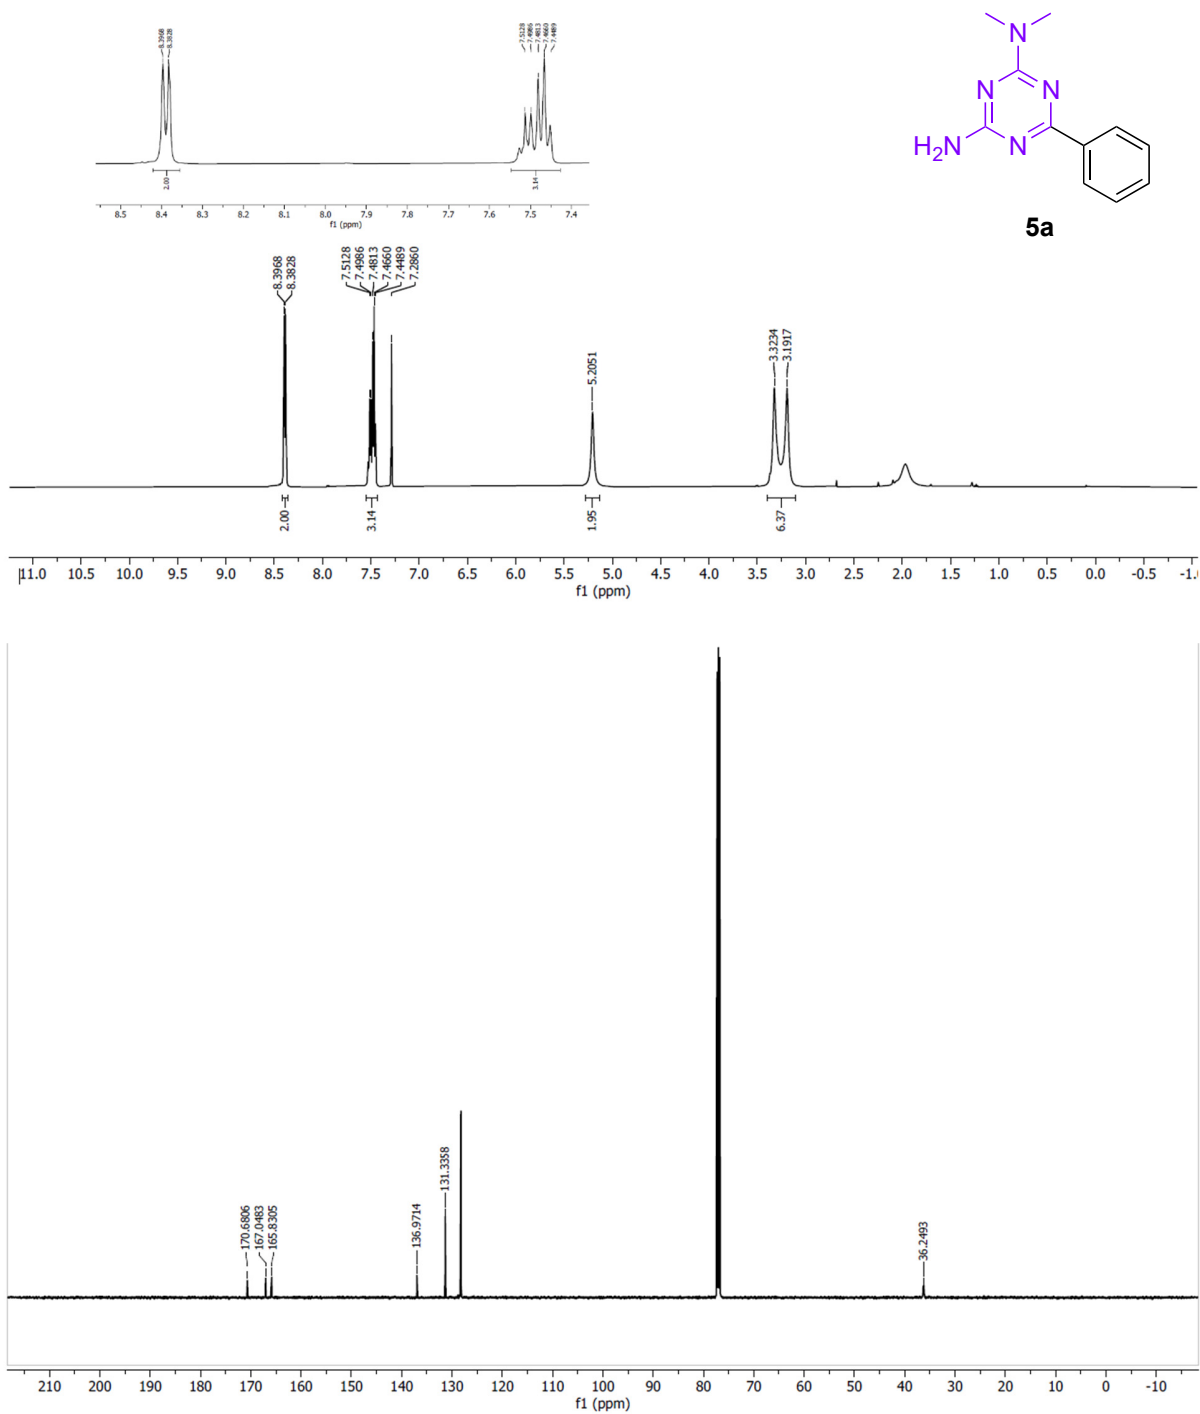

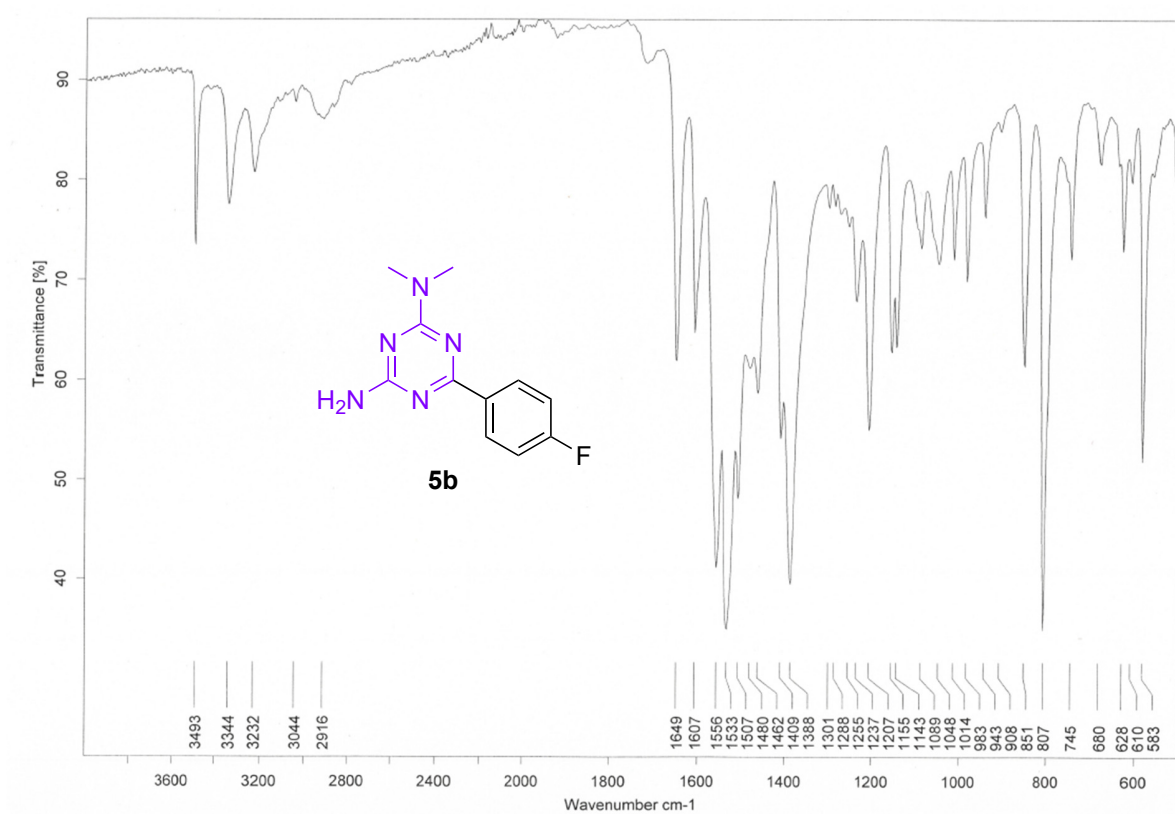

| Compound Label       | <i>m/z</i> | RT    | Algorithm       | Calcd. Mass |
|----------------------|------------|-------|-----------------|-------------|
| Cpd 1: 0.186 79.0214 | 233.1074   | 0.186 | Find By Formula | 233.1077    |

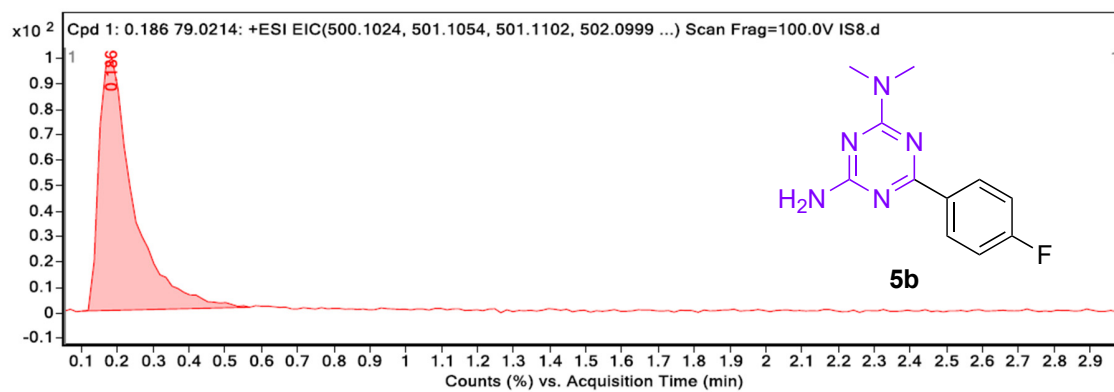

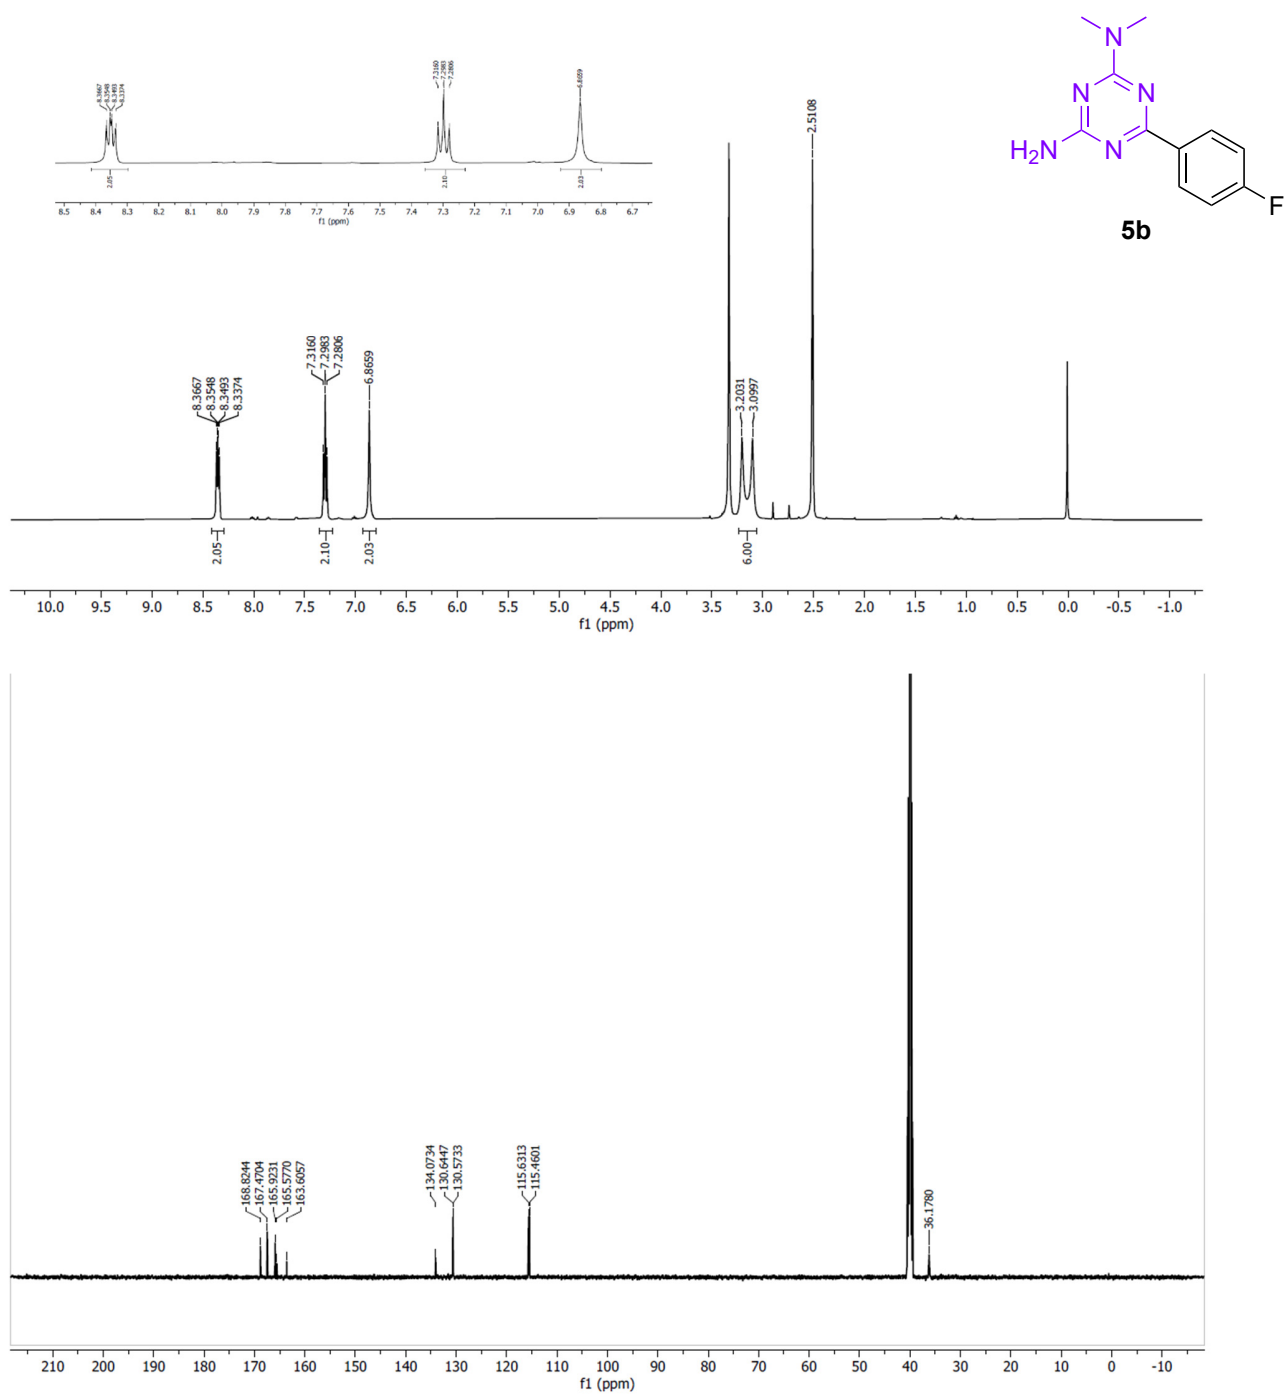

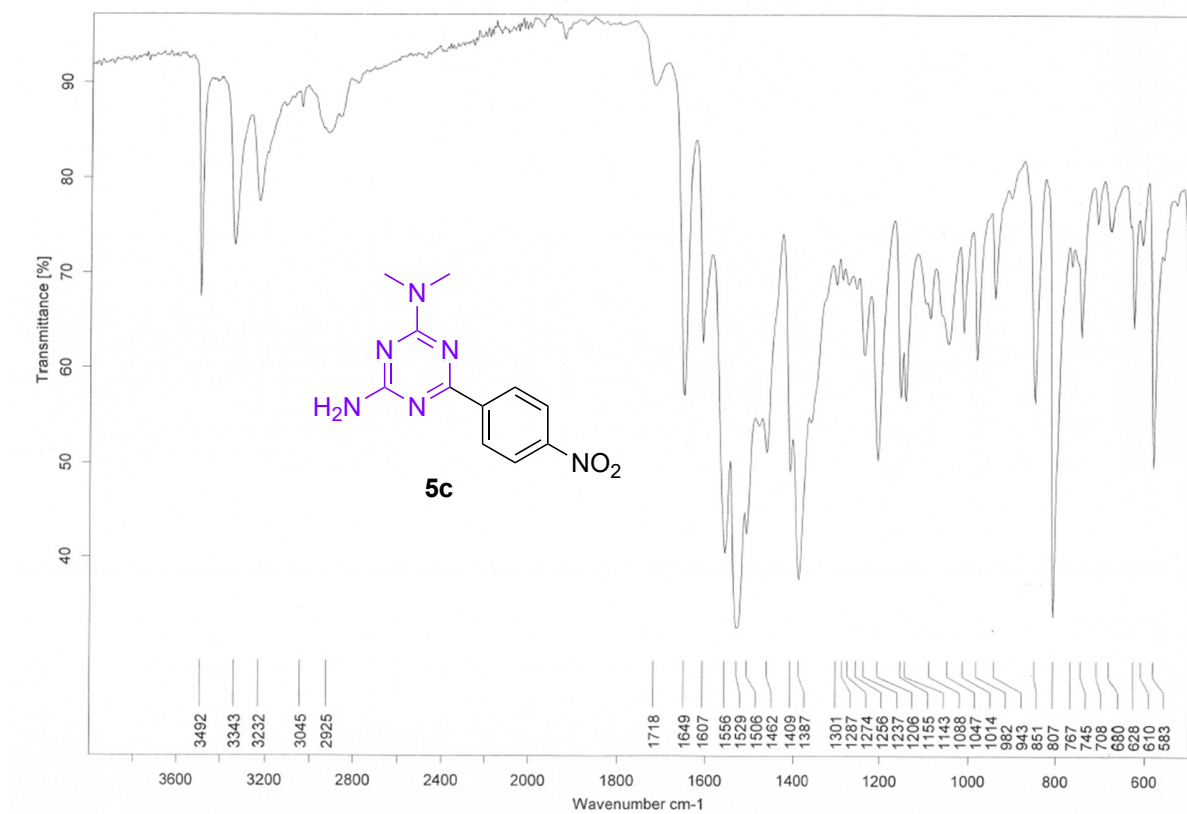

| Compound Label       | <i>m/z</i> | RT   | Algorithm       | Calcd. Mass |
|----------------------|------------|------|-----------------|-------------|
| Cpd 1: 0.180 79.0214 | 260.1025   | 0.18 | Find By Formula | 260.1022    |

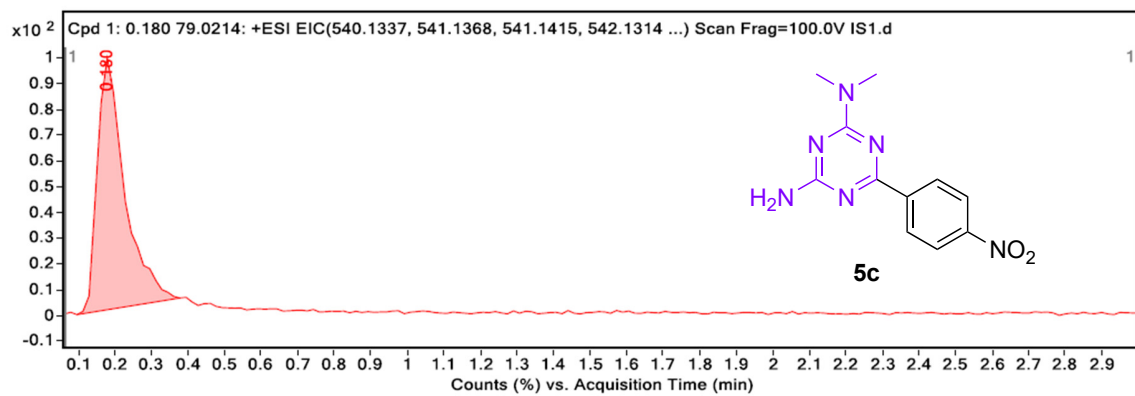

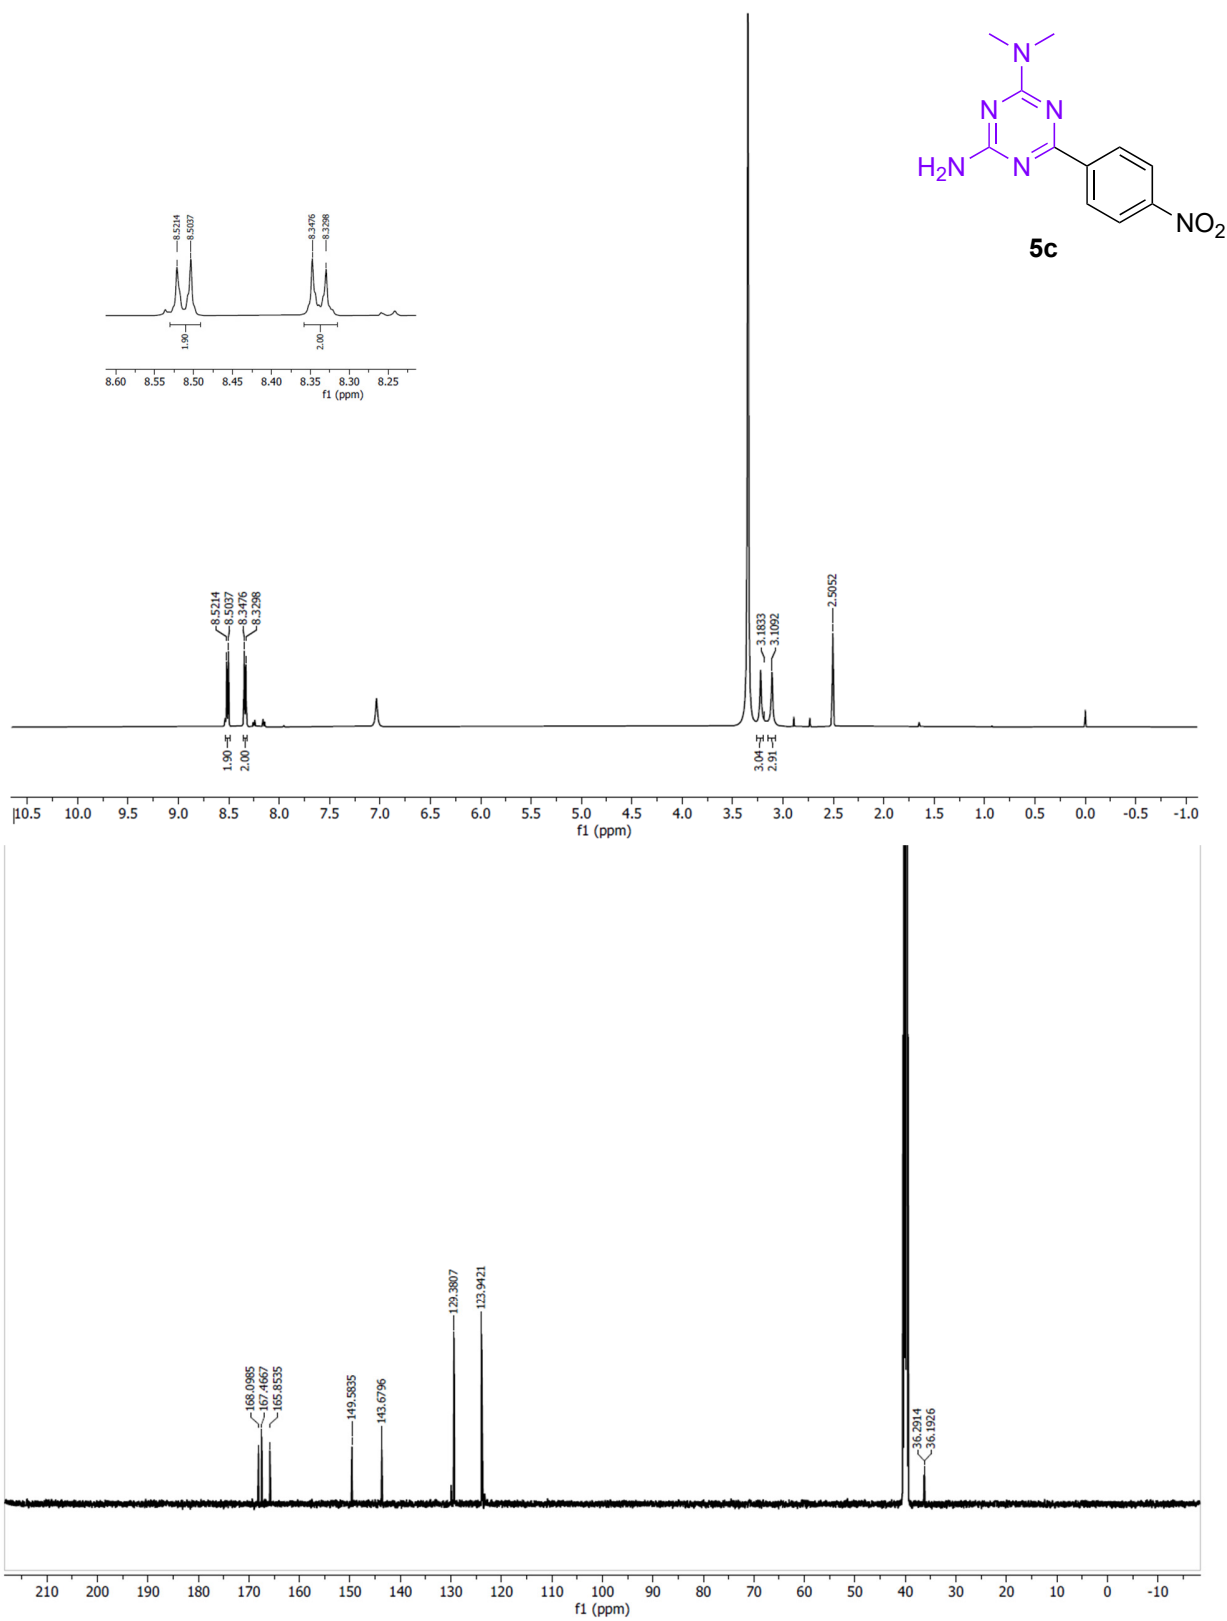

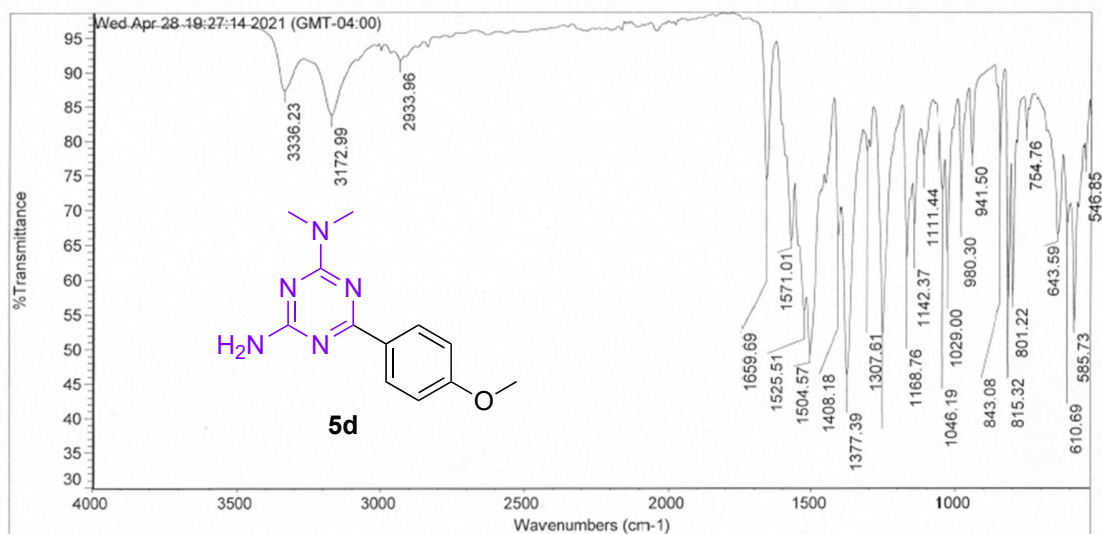

| Compound Label       | m/z      | RT    | Algorithm       | Calcd. Mass |
|----------------------|----------|-------|-----------------|-------------|
| Cpd 1: 0.181 79.0214 | 245.1281 | 0.181 | Find By Formula | 245.1277    |

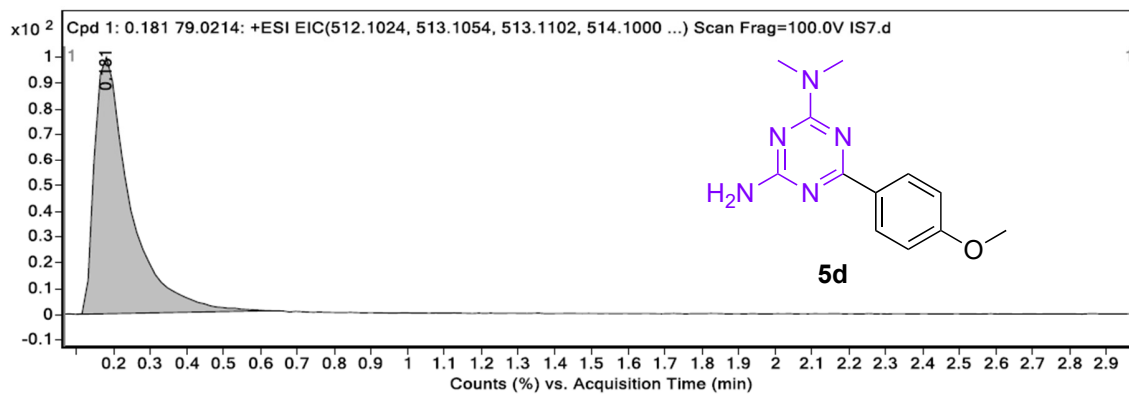



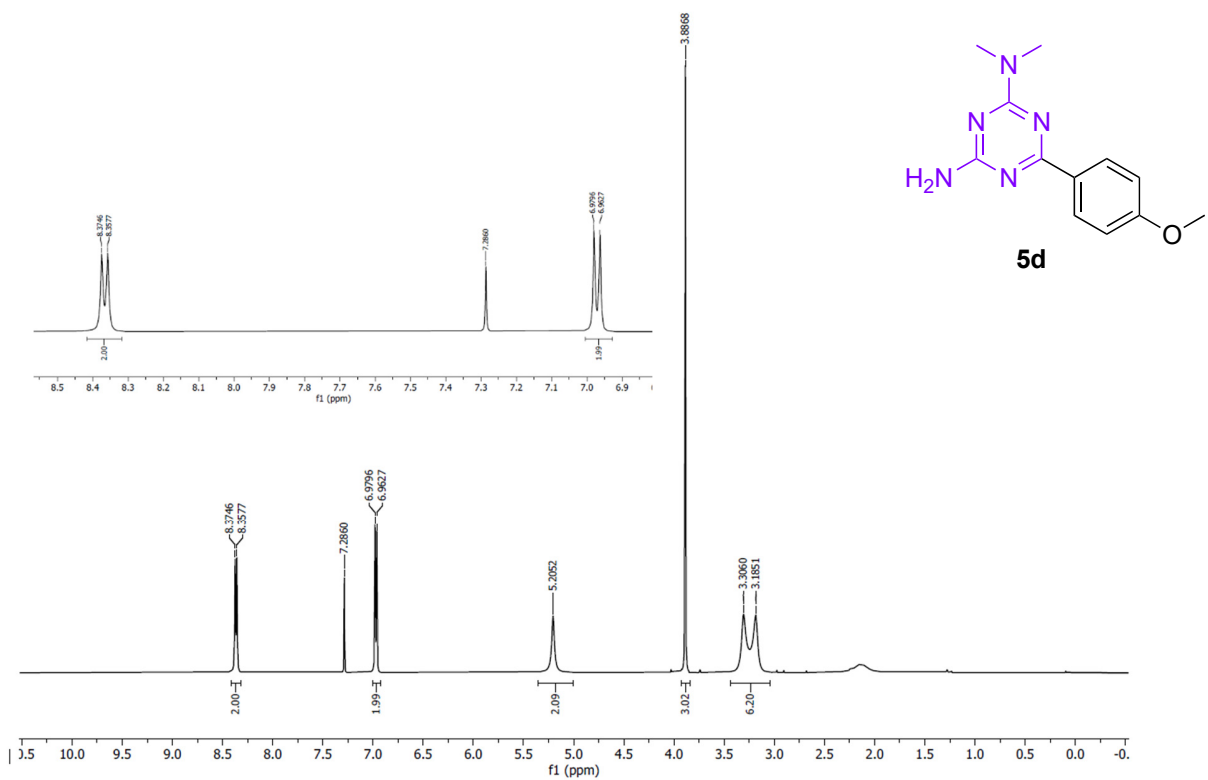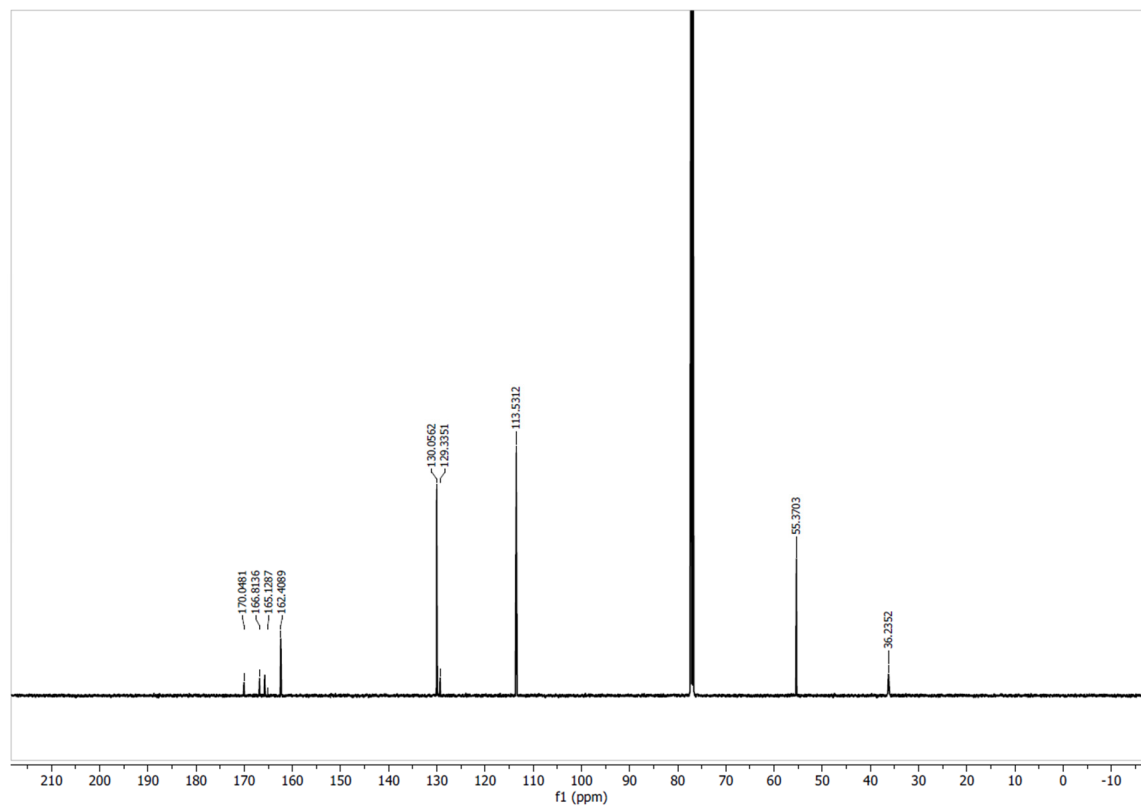

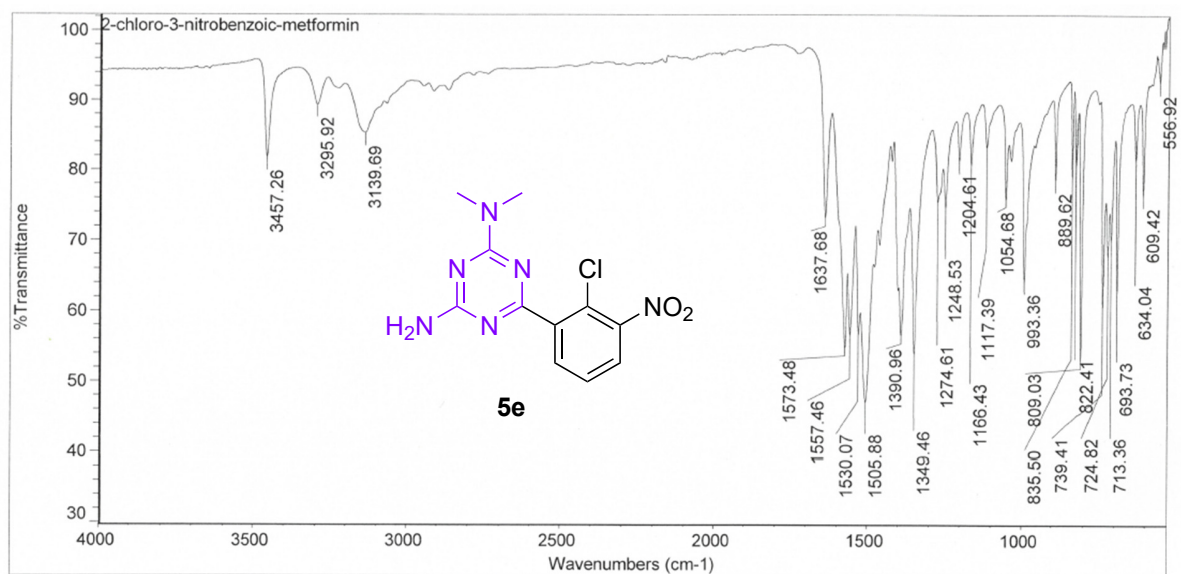

| Compound Label       | <i>m/z</i> | RT    | Algorithm       | Calcd. Mass |
|----------------------|------------|-------|-----------------|-------------|
| Cpd 1: 0.174 79.0213 | 294.0633   | 0.174 | Find By Formula | 294.0632    |

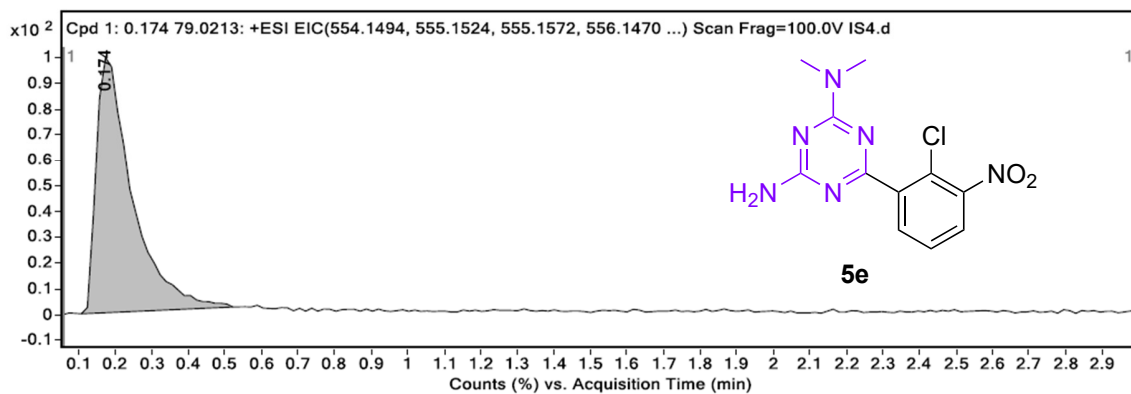

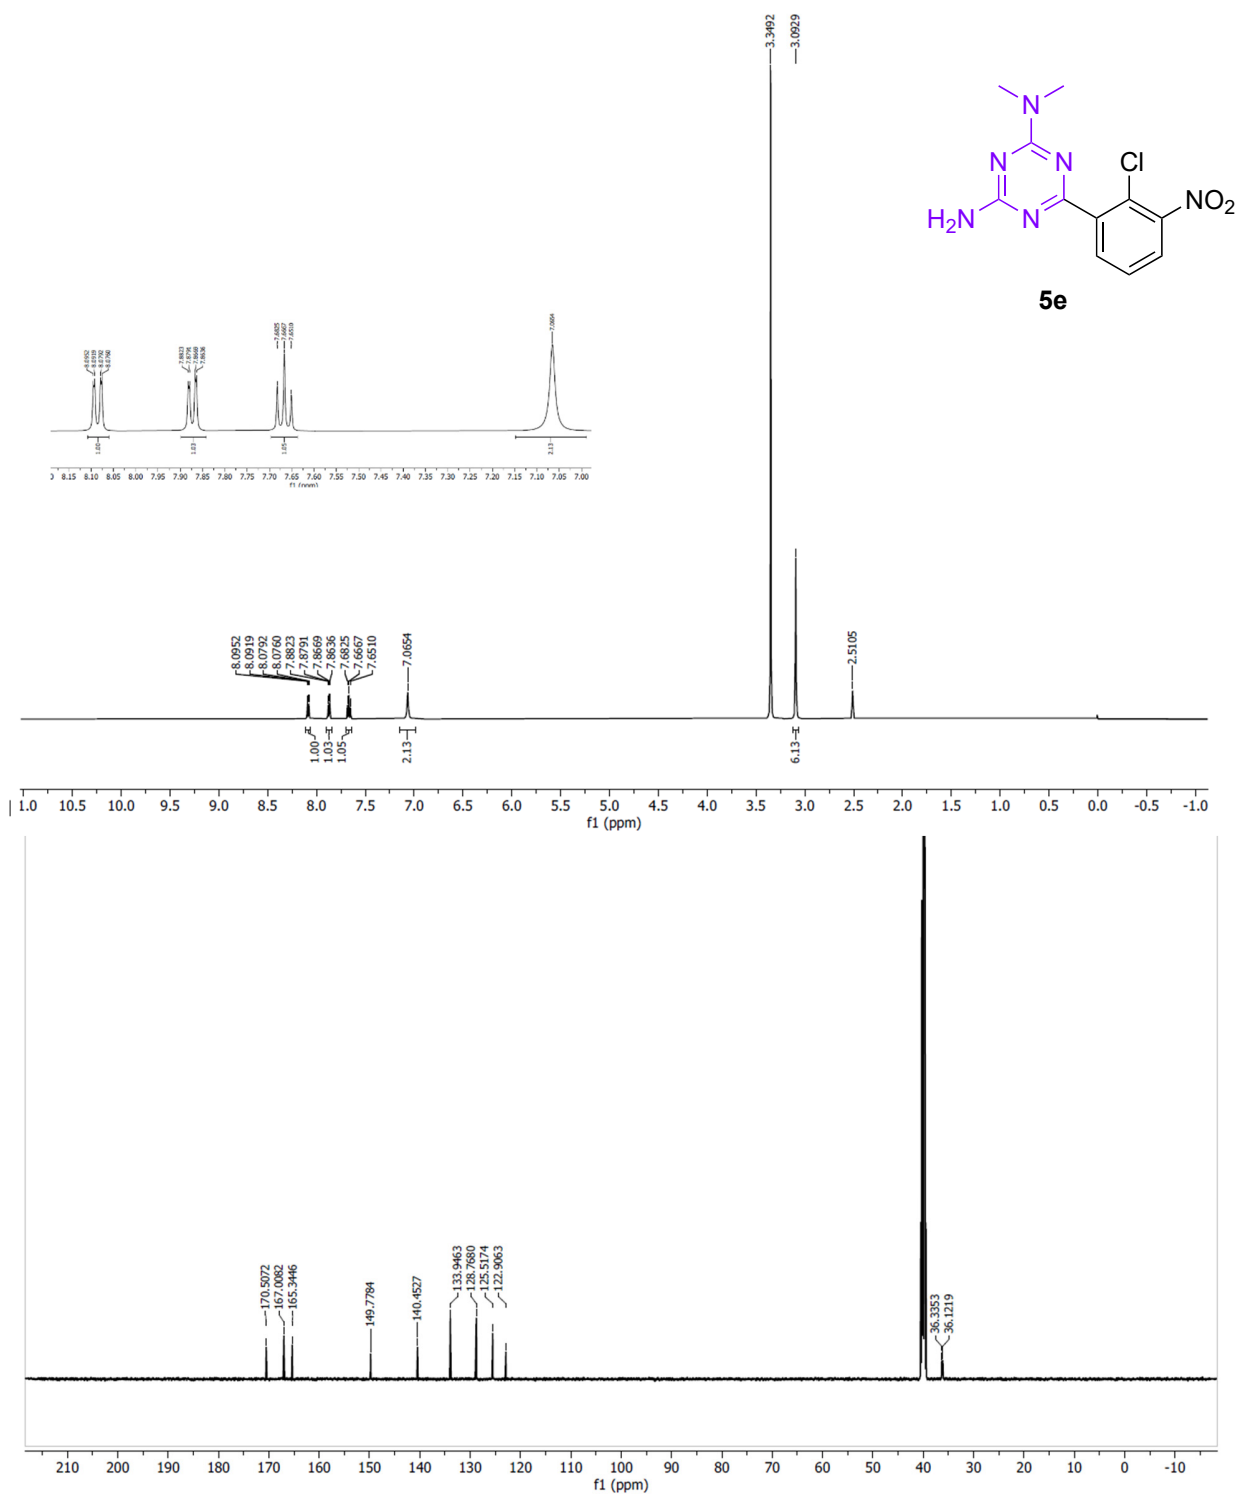

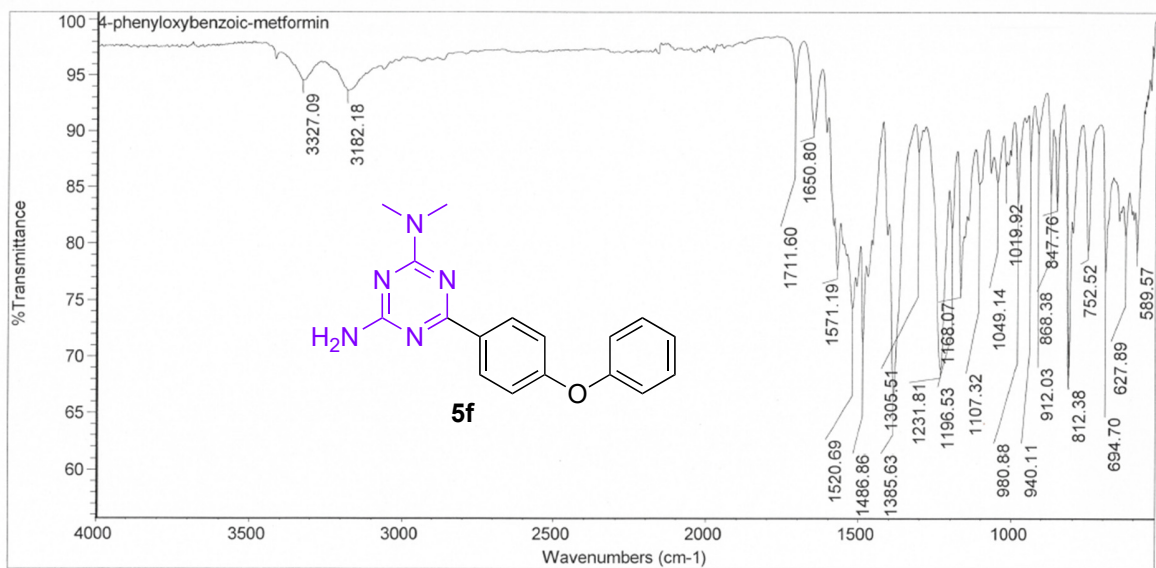

| Compound Label       | <i>m/z</i> | RT    | Algorithm       | Calcd. Mass |
|----------------------|------------|-------|-----------------|-------------|
| Cpd 1: 0.184 79.0213 | 307.1429   | 0.184 | Find By Formula | 307.1433    |

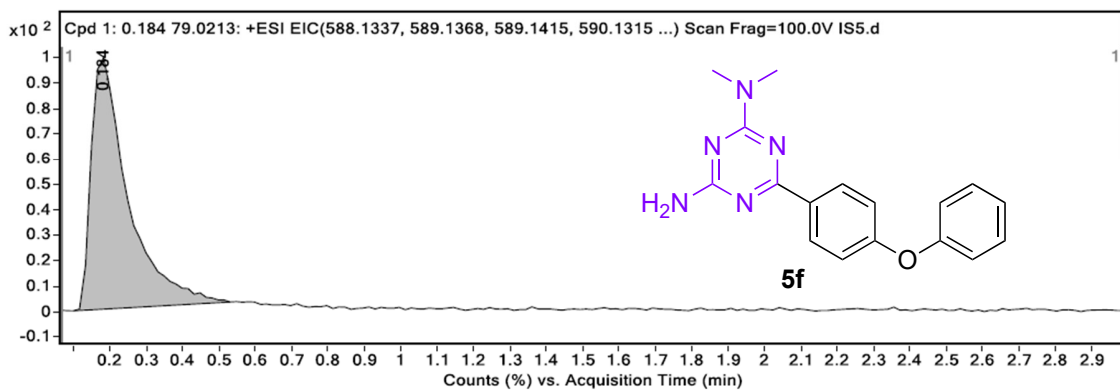



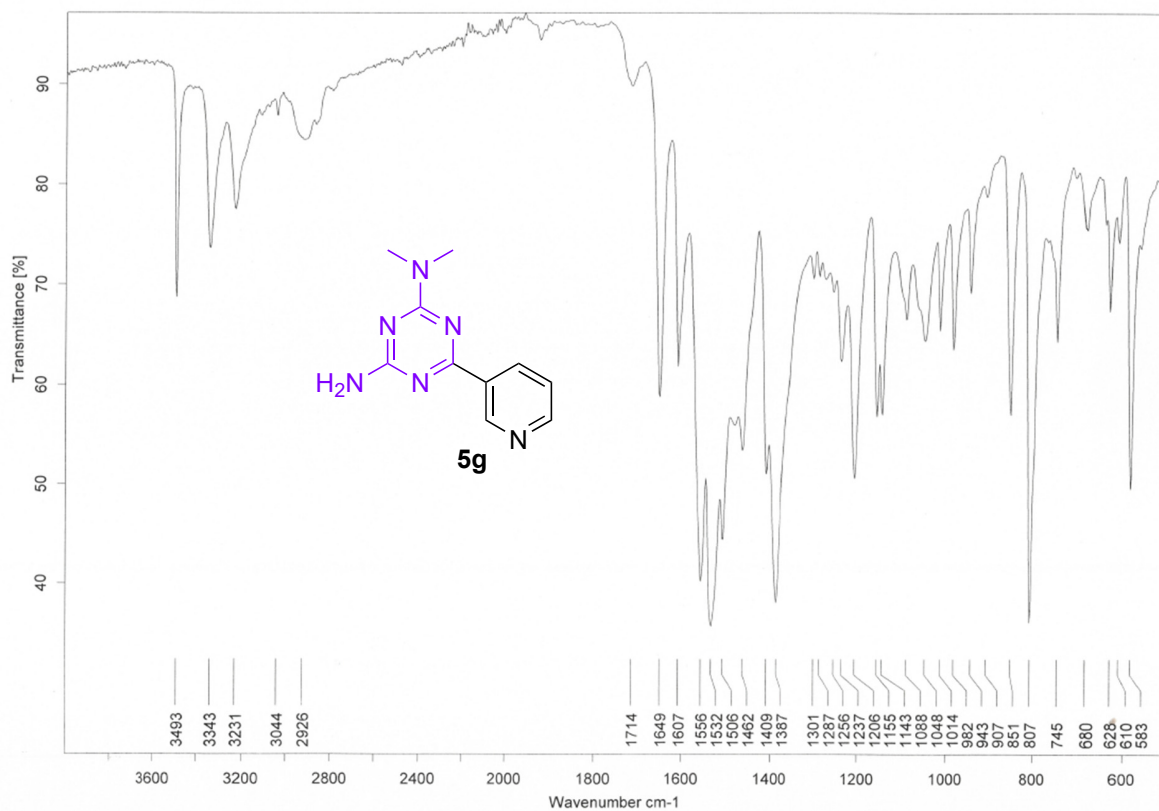

| Compound Label       | <i>m/z</i> | RT    | Algorithm       | Calcd. Mass |
|----------------------|------------|-------|-----------------|-------------|
| Cpd 1: 0.181 79.0214 | 216.1129   | 0.181 | Find By Formula | 216.1123    |

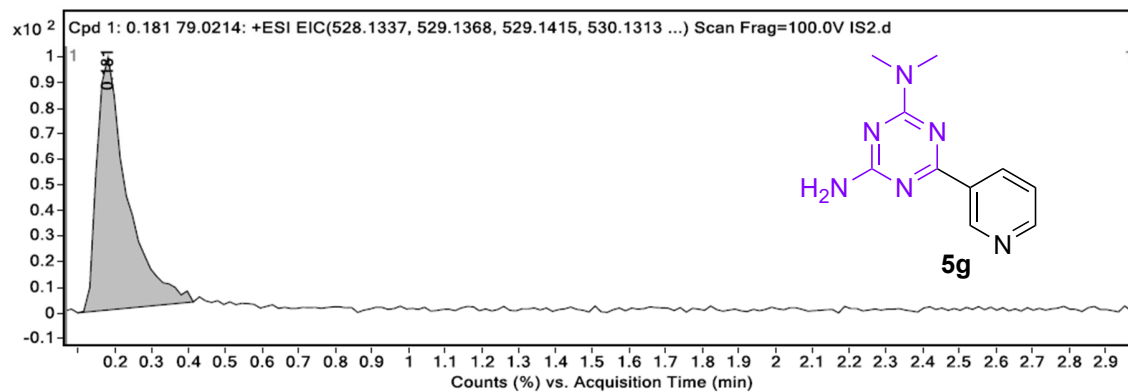

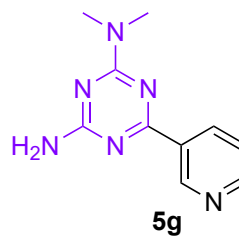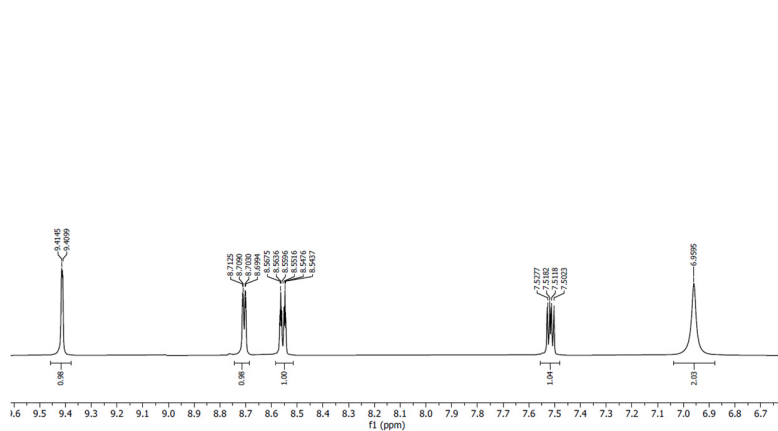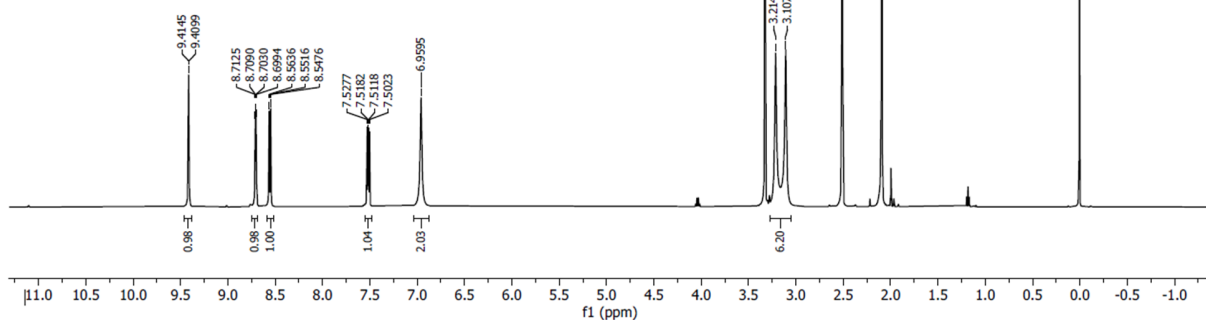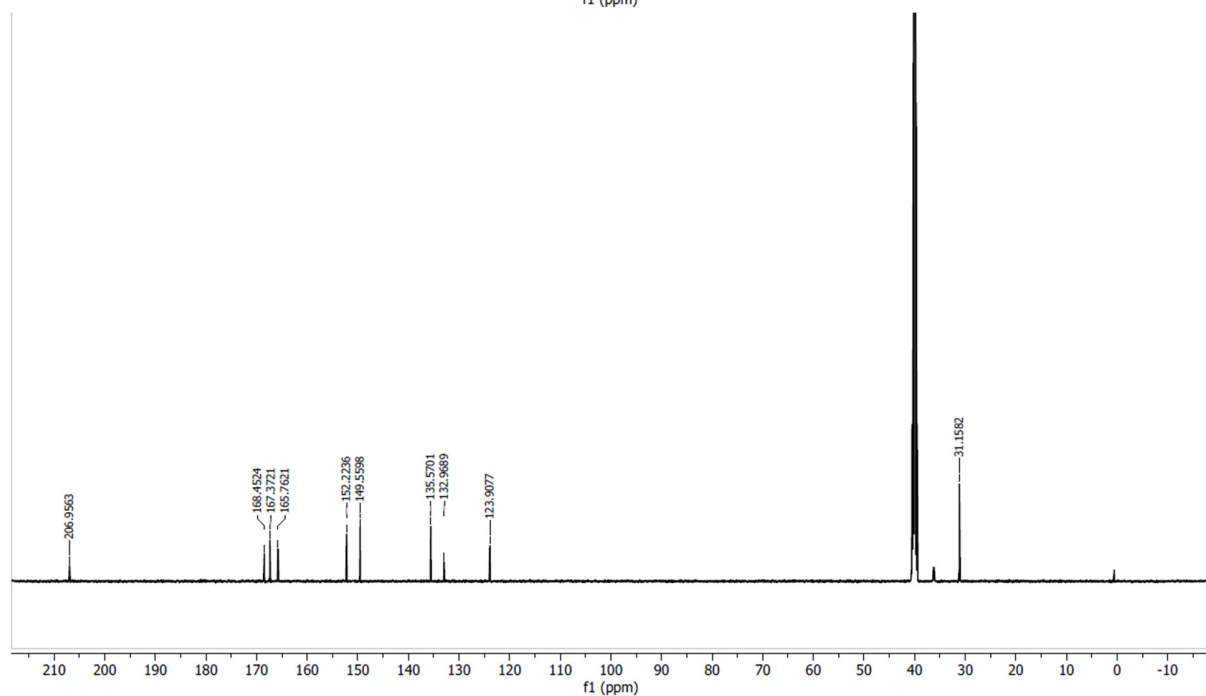

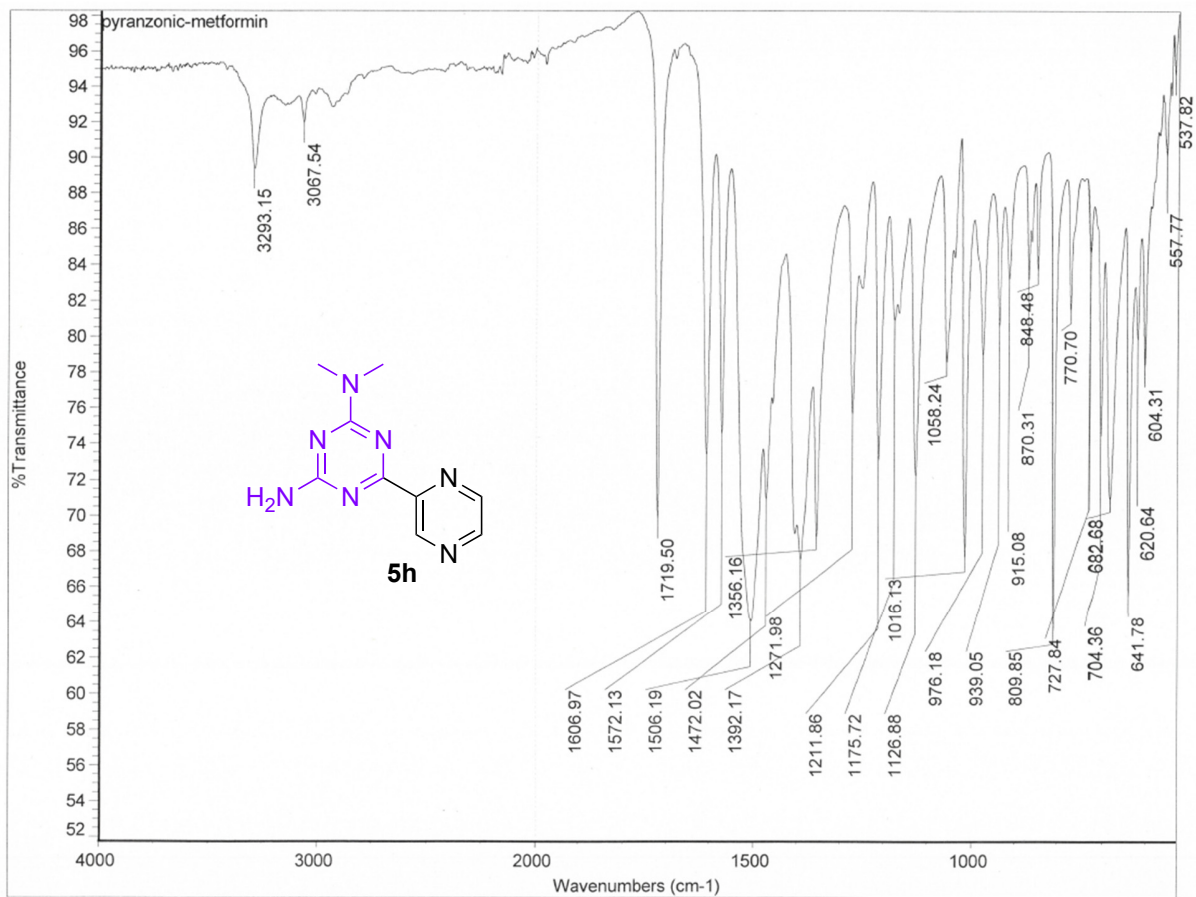

| Compound Label       | <i>m/z</i> | RT    | Algorithm       | Calcd. Mass |
|----------------------|------------|-------|-----------------|-------------|
| Cpd 1: 0.177 79.0214 | 217.1082   | 0.177 | Find By Formula | 217.1076    |

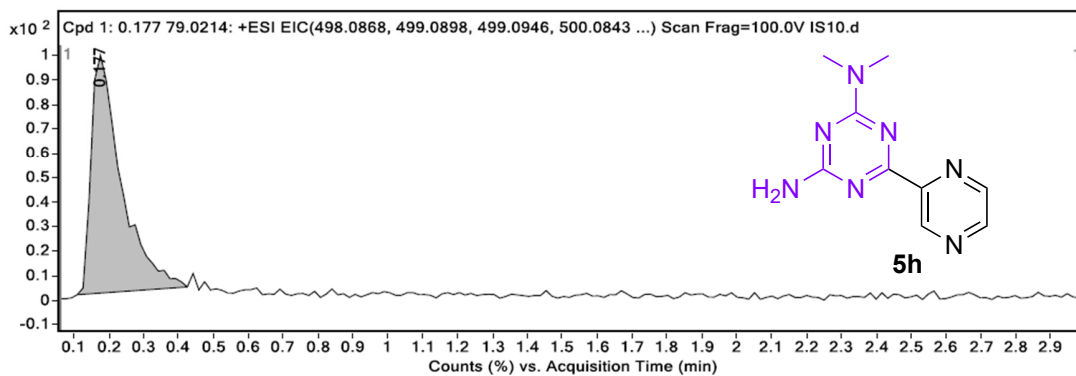



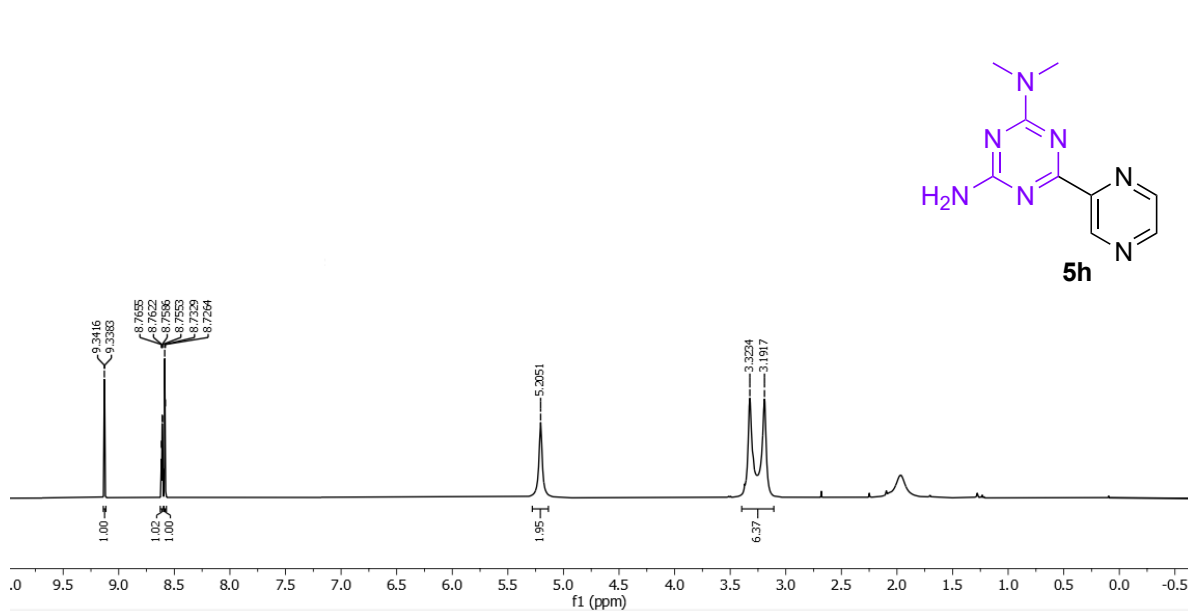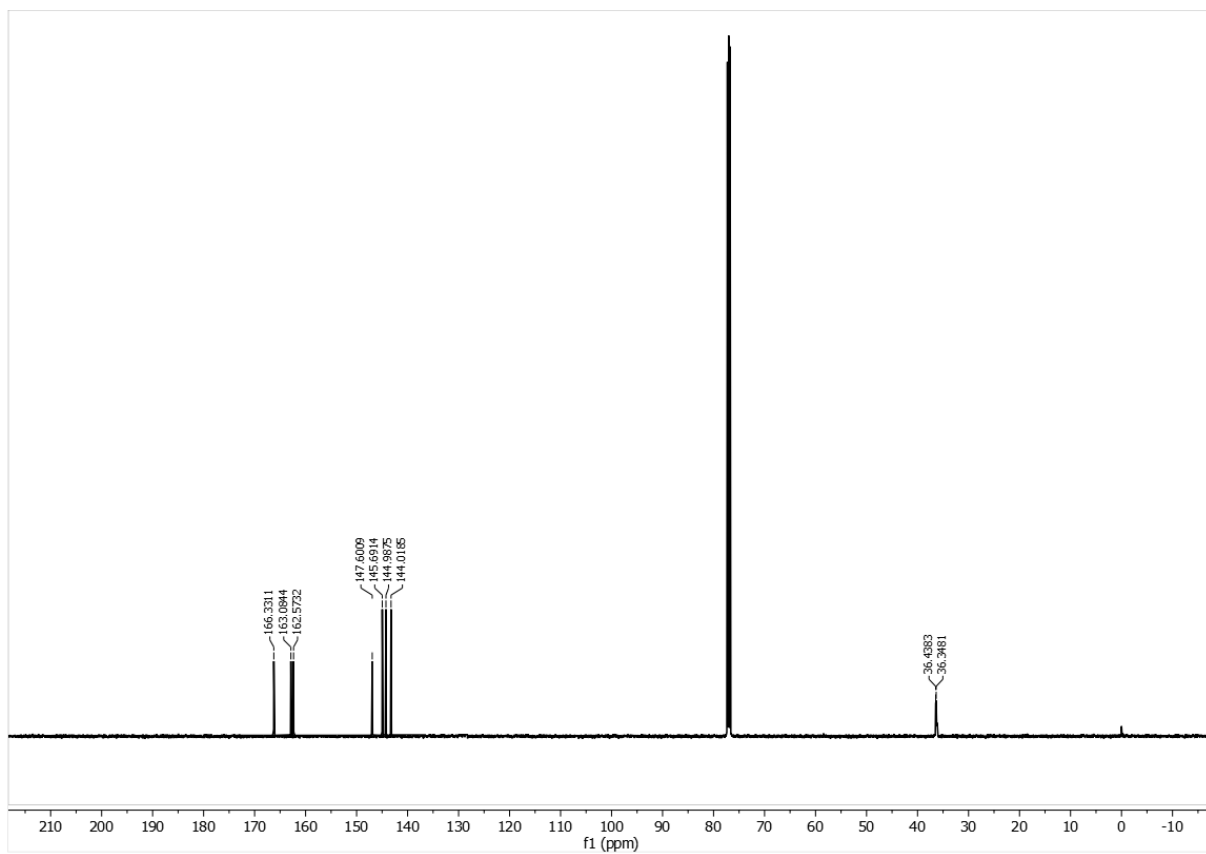

Supplement: s1 [file s1]
